# Supplementary material for: A oxygen vacancy-modulated homojunction structural CuBi2O4 photocathodes for efficient solar water reduction
Source: Royal Society of Chemistry journal article supplement (doi:10.1039/d0nr04473c), 2020-01-01
Supplement: d0nr04473c1.pdf [file d0nr04473c1.pdf]

## Supporting Information

### Oxygen Vacancy Modulated Homojunction Structural CuBi<sub>2</sub>O<sub>4</sub> for Efficient Solar Water Reduction

Shenqi Wei,<sup>a</sup> Chenglong Wang,<sup>a</sup> Xuefeng Long,<sup>a</sup> Tong Wang,<sup>a</sup> Peng Wang,<sup>a</sup> Mingrui Zhang,<sup>b</sup> Shuwen Li,<sup>a</sup> Jiantai Ma,<sup>a</sup> Jun Jin<sup>\*a</sup> and Lan Wu<sup>\*b</sup>

*<sup>a</sup>State Key Laboratory of Applied Organic Chemistry (SKLAOC), The Key Laboratory of Catalytic Engineering of Gansu Province College of Chemistry and Chemical Engineering, Lanzhou University Lanzhou, Gansu, 730000, P. R. China*

*E-mail: [jinjun@lzu.edu.cn](mailto:jinjun@lzu.edu.cn)*

*<sup>b</sup>College of Chemical Engineering, Northwest University for Nationalities, Lanzhou, Gansu 730030, P.R. China*

*E-mail: [wulan@xbmu.edu.cn](mailto:wulan@xbmu.edu.cn)*

## The equations

The conversion between potentials versus Ag/AgCl and versus RHE is determined using the equation below.

$$\begin{aligned} E(\text{versus RHE}) &= E(\text{versus Ag/AgCl}) + E_{\text{Ag/AgCl}}(\text{refer}) + 0.0591\text{V} \times \text{pH} \\ E_{\text{Ag/AgCl}}(\text{refer}) &= 0.197\text{ V versus NHE at } 25\text{ }^{\circ}\text{C} \end{aligned} \quad (1)$$

Incident photon to current efficiency (IPCE) was obtained using an Oriel Cornerstone 260 1/4 m monochromator with a 500W Oriel Xe lamp as the simulated light source (LSH-X500B). An applied potential of 1.23 V vs. RHE was supplied by a miniature integrated electrochemical workstation (Zolix Instruments Co., Ltd). IPCE values were calculated using the equation below

$$IPCE(\%) = \frac{J \times 1240}{\lambda \times P_{\text{light}}} \times 100\% \quad (2)$$

J refers to the photocurrent density ( $\text{mA cm}^{-2}$ ) obtained from the electrochemical workstation.  $\lambda$  and  $P_{\text{light}}$  are the incident light wavelength (nm) and the power density obtained at a specific wavelength ( $\text{mW cm}^{-2}$ ), respectively.

Applied bias photon-to-current efficiency (ABPE) can be calculated using the following equation:

$$ABPE(\%) = \frac{J \times (1.23 - V_b)}{P_{\text{light}}} \times 100\% \quad (3)$$

J refers to the photocurrent density ( $\text{mA cm}^{-2}$ ) obtained from the electrochemical workstation.  $V_b$  is the applied bias vs. RHE (V), and  $P_{\text{light}}$  is the total light intensity of AM 1.5 G ( $100\text{ mW cm}^{-2}$ ).

The light absorption efficiency or light harvesting efficiencies (LHE, defined as the ratio of absorbed light to the incident light) of each photoanodes are calculated from their UV–Vis absorption spectra:

$$LHE = 1 - 10^{-A(\lambda)} \quad (4)$$

where  $A(\lambda)$  is the absorbance at a specific wavelength. In order to calculate  $J_{\text{abs}}$  (the photocurrent density achievable assuming 100% absorbed photon-to-current conversion efficiency for photons) the solar spectral irradiance at AM 1.5G ( $\text{W}\cdot\text{m}^{-2}\cdot\text{nm}^{-1}$ , ASTM G173–03) is first converted to solar photocurrents vs. wavelength ( $\text{A}\cdot\text{m}^{-2}\cdot\text{nm}^{-1}$ ) assuming 100% IPCE for photons. Then the solar photocurrents are multiplied by the LHE at each wavelength and adding these products up.

According to the M-S curves, charge carrier density ( $N_d$ ) can be calculated using the following equation:

$$N_d = \frac{2}{e\epsilon_0\epsilon} \times \left[ \frac{d\left[\frac{1}{C^2}\right]}{dV_s} \right]^{-1} \quad (5)$$

The electronic charge ( $e$ ) is  $1.6 \times 10^{-19}$  C, vacuum permittivity ( $\epsilon_0$ ) is  $8.854 \times 10^{-14}$  F  $\text{m}^{-1}$ , and relative permittivity ( $\epsilon$ ) is 80 for CBO.  $C$  (F  $\text{cm}^{-2}$ ) is the space charge capacitance in the semiconductor (obtained from M-S curves), and  $V_s$  (V) is the applied potential for M-S curves.

the efficiency of charge transport in the bulk ( $\eta_{\text{bulk}}$ , relating to bulk charge separation) and surface charge transfer efficiency ( $\eta_{\text{surface}}$ , the yield of holes that are involved in water oxidation reaction after reaching the

electrode/electrolyte interfaces) of the prepared photoanodes, can be calculated using the following equations:

$$\eta_{bulk} = \frac{J^{Na_2SO_3}}{J_{abs}} \quad (6)$$

$$\eta_{surface} = \frac{J^{H_2O}}{J^{Na_2SO_3}} \quad (7)$$

$J_{abs}$  is the unity converted photocurrent density from the light absorption, while  $J^{H_2O}$  and  $J^{Na_2SO_3}$  are the photocurrent densities obtained in 1 M KOH electrolyte and 1 M  $Na_2SO_3$  (pH 9.5), respectively.

The formula for calculating transient decay time  $D$  is as follows:

$$D = (I_t - I_s)/(I_m - I_s) \quad (8)$$

in which  $I_t$  is the current at time  $t$ ,  $I_s$  is the stabilized current, and  $I_m$  is the current spike. The transient decay time can be defined as the time at which  $\ln D = -1$ .

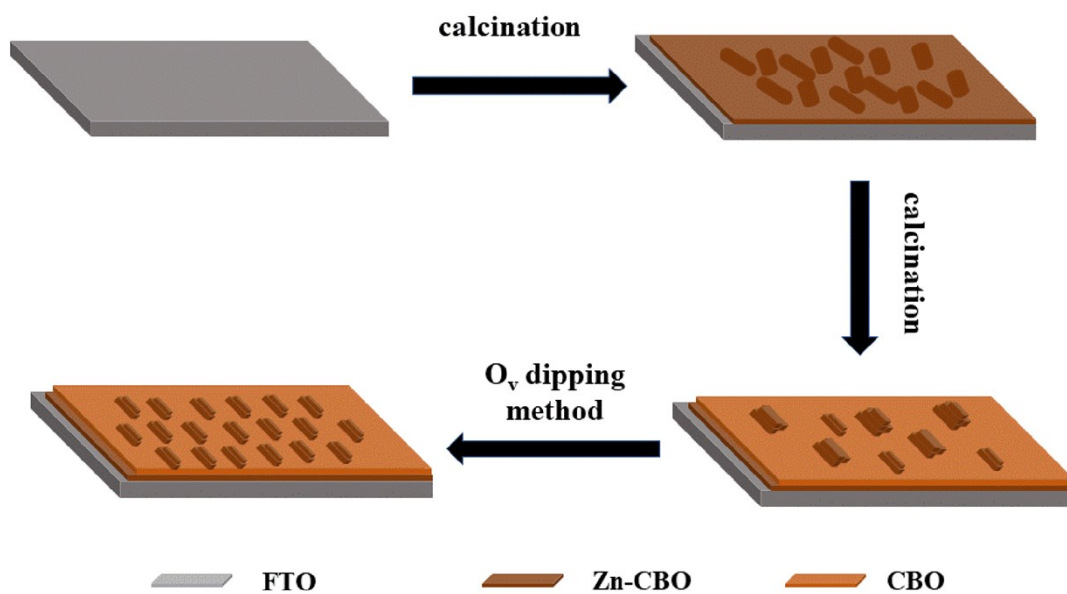

**Scheme S1.** Schematic diagram of the preparation procedure of the O<sub>v</sub>/CBO/Zn-CBO photocathode.

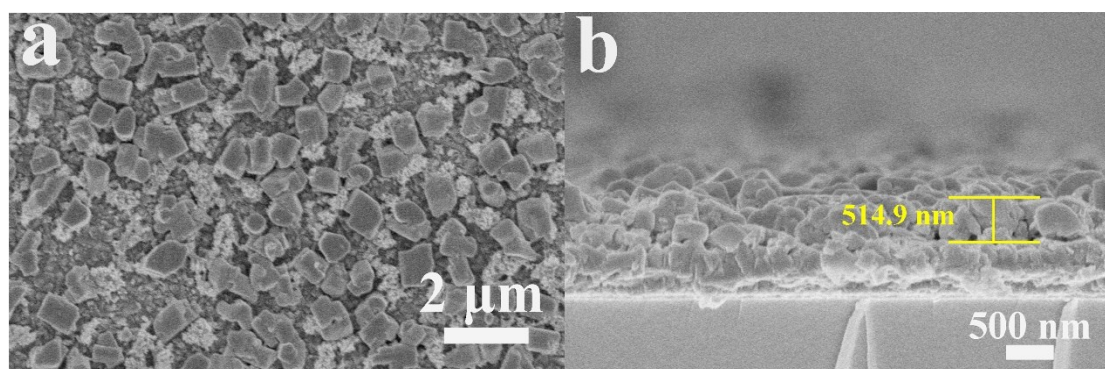

**Figure. S1** Top-view SEM images of (a) CBO/Zn-CBO. Cross-sectional view SEM images of (b) CBO

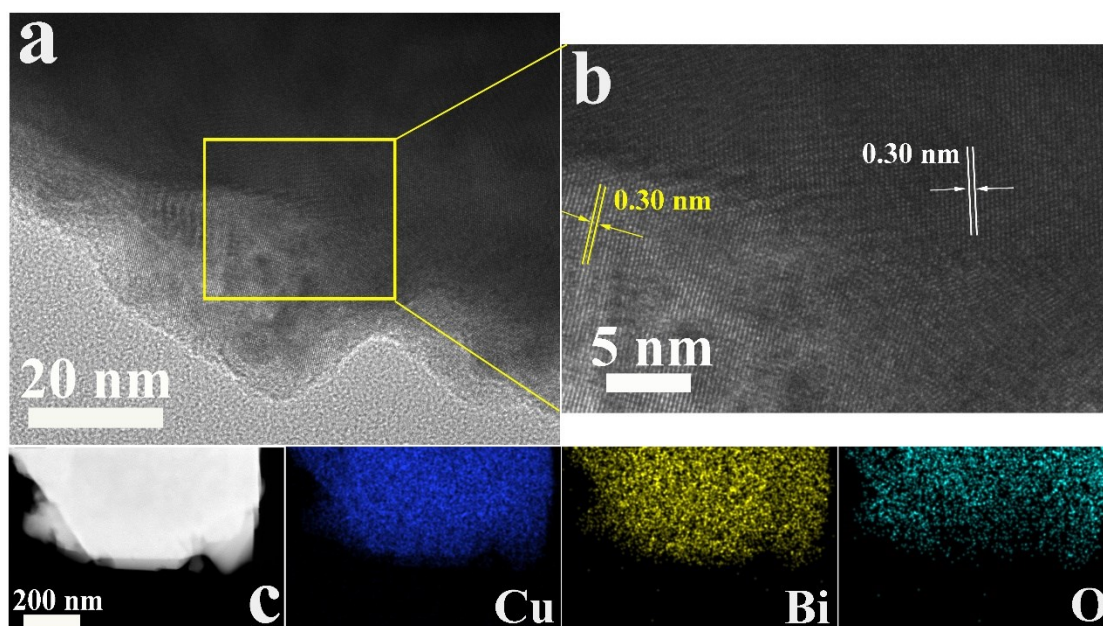

**Figure. S2** TEM images of (a) CBO/Zn-CBO, HRTEM images of (b) CBO/Zn-CBO. (c) STEM-EDX element mapping for the CBO.

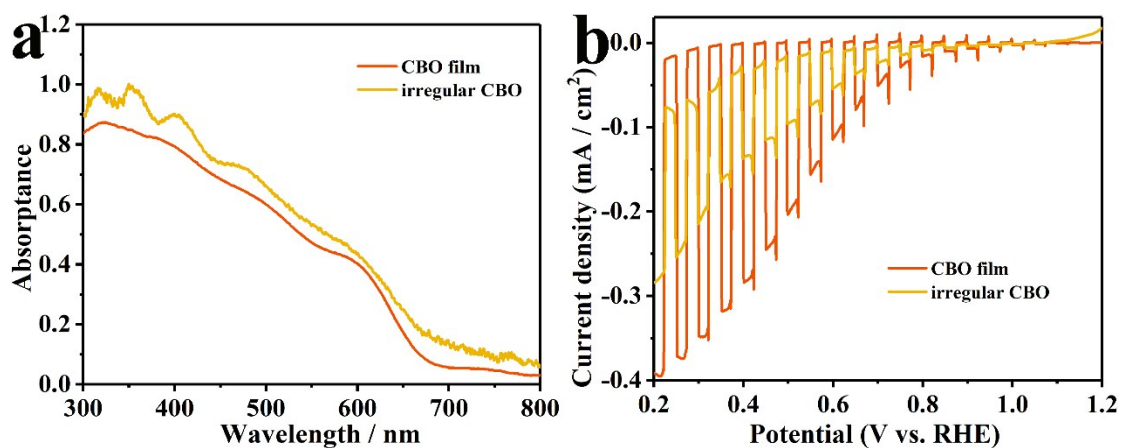

**Figure. S3** (a) UV-visible diffuse reflection spectra and (b) Photocurrent density curves of CBO film and irregular CBO

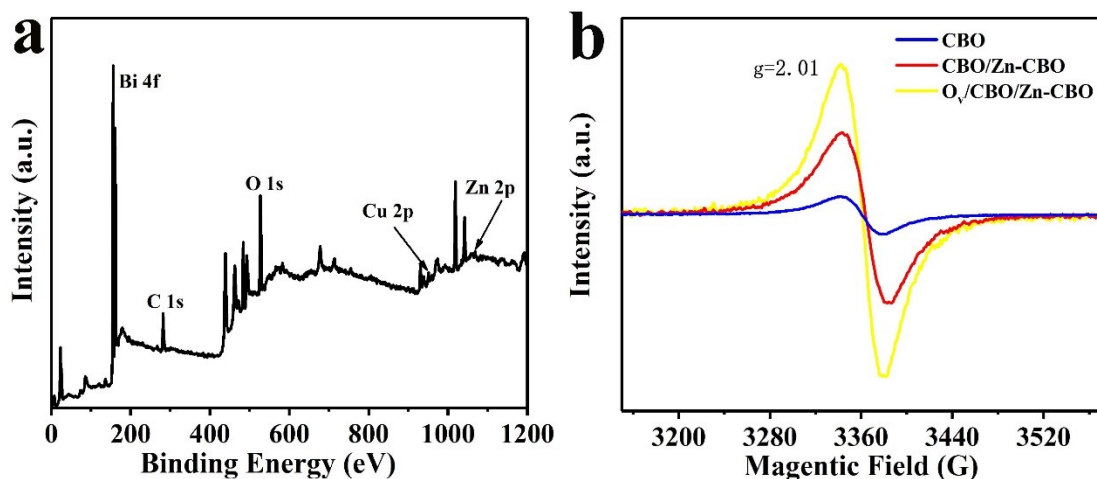

**Figure S4.** (a) XPS full spectrum (b) EPR measurements for CBO, CBO/Zn-CBO and  $O_v$ /CBO/Zn-CBO photocathodes.

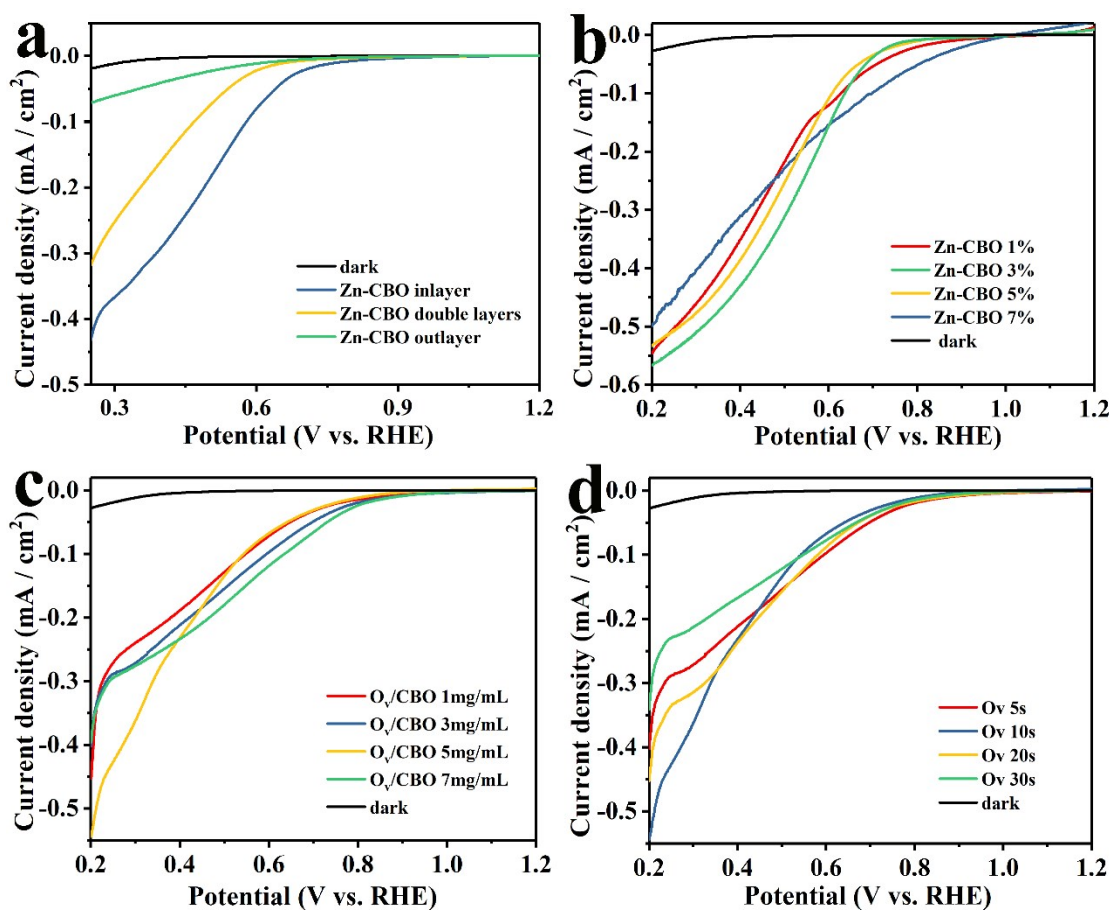

**Figure S5.** Photocurrent density curves of (a) Zn-doped CBO in different layers (inlayer out layer and double layers), (b) Zn-doped CBO at different concentrations (1 %, 3 %, 5 % and 7 %), (c) CBO treated with  $NaBH_4$  of different concentrations (1 mg/mL, 3 mg/mL, 5 mg/mL and 7 mg/mL), (d) CBO dipping with  $NaBH_4$  at different times (5 s, 10 s, 20 s and 30 s).

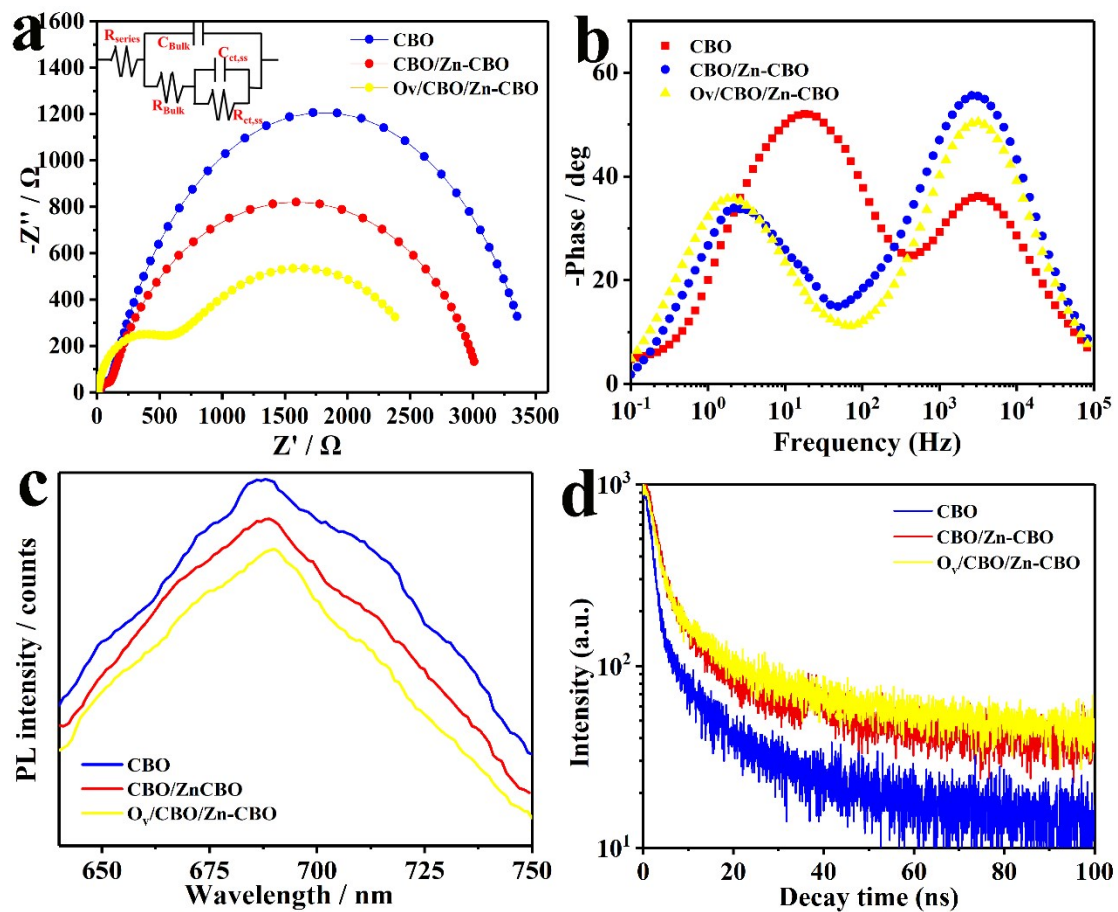

**Figure S6.** (a) Impedance curves (dark) and (b) Bode plots of the samples at 0.3 V vs. RHE under illumination (c) Steady-state photoluminescence emission spectra of all samples (d) photoluminescence decay curves of the samples.



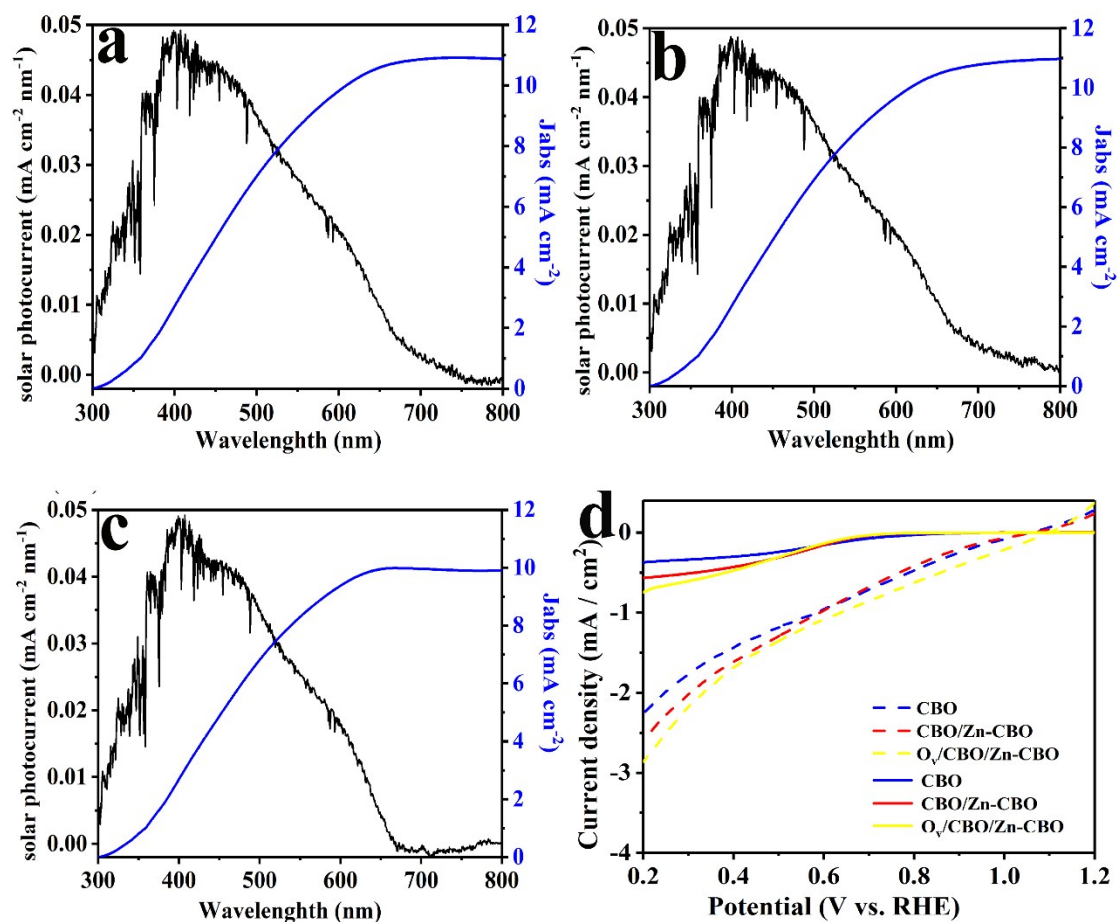

**Figure S7.** Jabs values of (a) CBO, (b) CBO/Zn-CBO, and (c)  $\text{O}_v/\text{CBO}/\text{Zn-CBO}$  photocathodes (assuming 100 % absorbed photon-to-current conversion efficiency for photons) (d) LSVs of CBO, CBO/Zn-CBO and  $\text{O}_v/\text{CBO}/\text{Zn-CBO}$  photocathodes with or without  $\text{H}_2\text{O}_2$ .

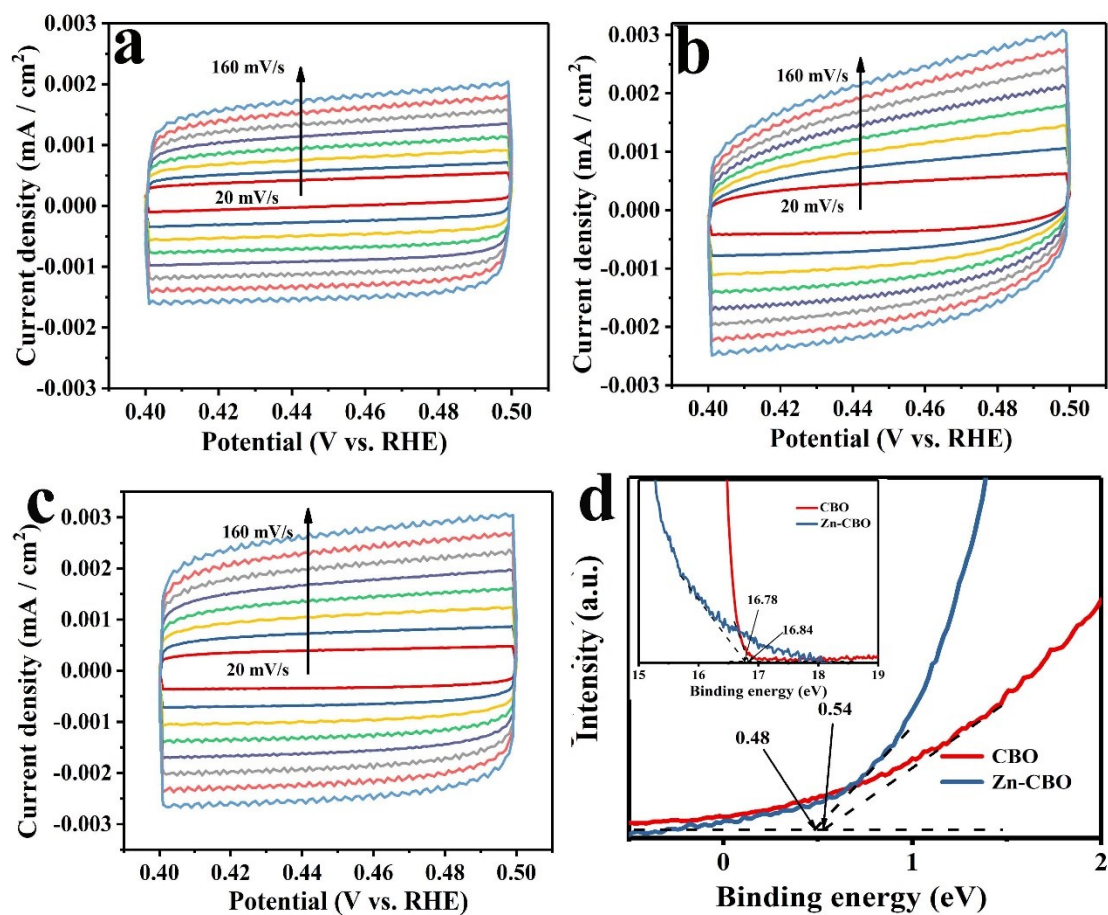

**Figure S8.** Voltammograms of the (a) CBO, (b) CBO/Zn-CBO, and (c) O<sub>v</sub>/CBO/Zn-CBO photocathodes at various scan rates (20-160 mV/s) (d) UPS spectra for CBO and Zn-CBO photocathodes.

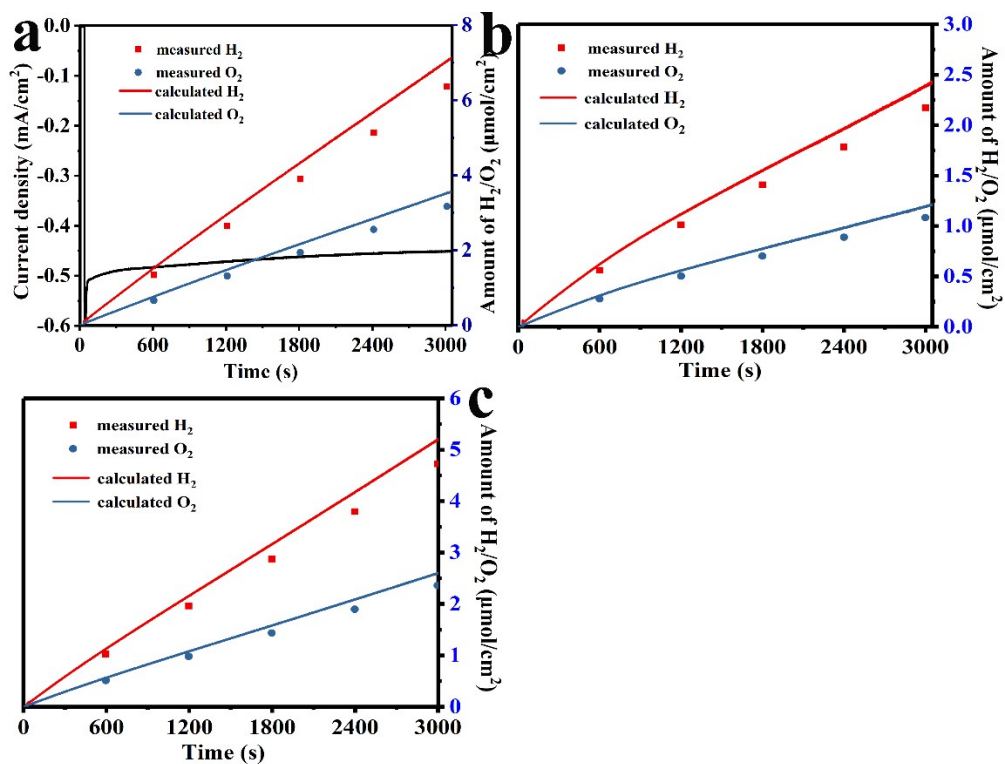

**Figure S9** I-t curve and calculated (solid lines) and measured (dots) H<sub>2</sub> and O<sub>2</sub> evolution at 0.3 V vs. RHE over the (a) O<sub>v</sub>/CBO/Zn-CBO (b) CBO and (c) CBO/Zn-CBO photocathode.

**Table S1. Comparison of our photocathode to other CuBi<sub>2</sub>O<sub>4</sub>-based photocathode.**

| Year | Photocathode                                                                                                | Morphology      | Electrolyte (pH)                                                                | Photocurrent density                                                                       | Ref.                                          |
|------|-------------------------------------------------------------------------------------------------------------|-----------------|---------------------------------------------------------------------------------|--------------------------------------------------------------------------------------------|-----------------------------------------------|
| 2020 | O <sub>v</sub> /CuBi <sub>2</sub> O <sub>4</sub> /Zn-CuBi <sub>2</sub> O <sub>4</sub>                       | irregular bumps | 0.3 M K <sub>2</sub> SO <sub>4</sub> /0.2 M Phosphate buffer solution (pH 6.65) | 0.6 mA/cm <sup>2</sup> at 0.3 V <sub>RHE</sub>                                             | This work                                     |
| 2014 | CuO/CuBi <sub>2</sub> O <sub>4</sub> /Pt                                                                    | film            | 0.3 M K <sub>2</sub> SO <sub>4</sub> , 0.1 M phosphate (pH 6.8)                 | 0.71 mA/cm <sup>2</sup> at 0.4 V <sub>RHE</sub>                                            | Phys Chem Chem Phys, 2014, 16, 22462-22465    |
| 2014 | CuBi <sub>2</sub> O <sub>4</sub> /CuO                                                                       | nanoflower      | 0.1 M Na <sub>2</sub> SO <sub>4</sub>                                           | 0.38 mA/cm <sup>2</sup> at 0.3 V <sub>RHE</sub>                                            | J. Mater. Chem. A, 2014, 2, 3661-3668         |
| 2015 | CuBi <sub>2</sub> O <sub>4</sub>                                                                            | film            | 0.1 M Na <sub>2</sub> SO <sub>4</sub> (pH 6)                                    | 0.01 mA/cm <sup>2</sup> at 0.3 V <sub>RHE</sub>                                            | J Mater Chem A, 2016, 4, 2936-2942            |
| 2016 | CuBi <sub>2</sub> O <sub>4</sub> / Ag-CuBi <sub>2</sub> O <sub>4</sub>                                      | film            | 0.1 M NaOH (pH 12.8)                                                            | 0.5 mA/cm <sup>2</sup> at 0.5 V <sub>RHE</sub>                                             | Chem Mater, 2016, 28, 4331-4340               |
| 2016 | Au/CuBi <sub>2</sub> O <sub>4</sub> /pt                                                                     | film            | 0.1 M Na <sub>2</sub> SO <sub>4</sub> (pH 6.8)                                  | 0.78 mA/cm <sup>2</sup> at 0.3 V <sub>RHE</sub>                                            | J Mater Chem A, 2016, 4, 8995-9001            |
| 2016 | CuBi <sub>2</sub> O <sub>4</sub> /pt                                                                        | film            | 0.3 M K <sub>2</sub> SO <sub>4</sub> and 0.2 M phosphate buffer (pH 6.65)       | 0.58 mA/cm <sup>2</sup> at 0.3 V <sub>RHE</sub>                                            | Chem Mater, 2016, 28, 4231-4242               |
| 2016 | CuBi <sub>2</sub> O <sub>4</sub>                                                                            | thin film       | 0.5 M Na <sub>2</sub> SO <sub>4</sub> (pH 6)                                    | 0.105 mA/cm <sup>2</sup> at 0.3 V <sub>RHE</sub>                                           | Mater Lett, 2017, 188, 192-196.               |
| 2017 | CuO/CuBi <sub>2</sub> O <sub>4</sub> and α-Bi <sub>2</sub> O <sub>3</sub> /CuBi <sub>2</sub> O <sub>4</sub> | nanocomposite   | 0.1 M Na <sub>2</sub> SO <sub>4</sub>                                           | 0.23 mA/cm <sup>2</sup> (CuO/CuBi <sub>2</sub> O <sub>4</sub> )<br>0.05 mA/cm <sup>2</sup> | J Phys Chem C, 2017, 121, 8252-8261           |
| 2017 | CuBi <sub>2</sub> O <sub>4</sub>                                                                            | thin film       | 0.3 M K <sub>2</sub> SO <sub>4</sub> and 0.2 M phosphate buffer (pH 6.65)       | Less than 0.3 mA/cm <sup>2</sup> at 0.6 V <sub>RHE</sub>                                   | J Mater Chem A, 2017, 5, 12838-12847          |
| 2017 | CuBi <sub>2</sub> O <sub>4</sub> /PTh                                                                       | porous film     | 0.3 M K <sub>2</sub> SO <sub>4</sub> and 0.2 M NaPi (pH 6.66)                   | 0.41 mA/cm <sup>2</sup> at 0.3 V <sub>RHE</sub>                                            | Int. J. Hydrogen. Energ. 2018 43 2064-2072    |
| 2018 | CuBi <sub>2</sub> O <sub>4</sub> /Au/N, Cu-C                                                                | film            | 0.3 M K <sub>2</sub> SO <sub>4</sub> /0.2 M Phosphate buffer solution (pH 6.68) | 0.31 mA/cm <sup>2</sup> at 0.5 V <sub>RHE</sub>                                            | ACS. Sustain. Chem. Eng. 2018 6 7257-7264.    |
| 2018 | CuBi <sub>2</sub> O <sub>4</sub>                                                                            | textured        | 0.1 M Na <sub>2</sub> SO <sub>4</sub> aqueous solution (pH 6.8)                 | 0.39 mA/cm <sup>2</sup> at 0.3 V <sub>RHE</sub>                                            | Chem Commun, 2018, 54, 3331-3334              |
| 2019 | CuBi <sub>2</sub> O <sub>4</sub> /ZnSe/P25                                                                  | film            | 0.3 M K <sub>2</sub> SO <sub>4</sub> /0.2 M Phosphate buffer solution (pH 6.65) | 0.43 mA/cm <sup>2</sup> at 0.3 V <sub>RHE</sub>                                            | ChemElectroChem, 2019, 6, 3367-3374.          |
| 2019 | Cu:NiO/CuBi <sub>2</sub> O <sub>4</sub>                                                                     | film            | 0.3 M K <sub>2</sub> SO <sub>4</sub> /0.2 M Phosphate buffer solution (pH 6.65) | 0.5 mA/cm <sup>2</sup> at 0.6 V <sub>RHE</sub>                                             | ChemElectroChem, 2019, 6, 3367-3374.          |
| 2020 | CuBi <sub>2</sub> O <sub>4</sub>                                                                            | Planar film     | 0.132 M KOH and 0.05 M KCl                                                      | 0.68 mA/cm <sup>2</sup> at 0.25 V <sub>RHE</sub>                                           | J Mater Chem A, 2019, 7, 9183-9194            |
| 2020 | CuO/CuBi <sub>2</sub> O <sub>4</sub>                                                                        | film            | 0.5 M Na <sub>2</sub> SO <sub>4</sub>                                           | 0.9 mA/cm <sup>2</sup> at 0.1 V <sub>RHE</sub>                                             | Int J Hydrogen Energy, 2020, 45, 15121-15128. |

1. H. S. Park, C. Y. Lee and E. Reisner, *Phys. Chem. Chem. Phys.*, 2014, **16**, 22462-22465.
2. R. Patil, S. Kelkar, R. Naphade and S. Ogale, *J. Mater. Chem. A*, 2014, **2**, 3661-3668.
3. G. Sharma, Z. Zhao, P. Sarker, B. A. Nail, J. Wang, M. N. Huda and F. E. Osterloh, *J. Mater. Chem. A*, 2016, **4**, 2936-2942.
4. D. Kang, J. C. Hill, Y. Park and K.-S. Choi, *Chem. Mater.*, 2016, **28**, 4331-4340.
5. D. Cao, N. Nasori, Z. Wang, Y. Mi, L. Wen, Y. Yang, S. Qu, Z. Wang and Y. Lei, *J. Mater. Chem. A*, 2016, **4**, 8995-9001.
6. S. P. Berglund, F. F. Abdi, P. Bogdanoff, A. Chemseddine, D. Friedrich and R. van de Krol, *Chem. Mater.*, 2016, **28**, 4231-4242.
7. Y.-H. Choi, K. D. Yang, D.-H. Kim, K. T. Nam and S.-H. Hong, *Mater. Lett.*, 2017, **188**, 192-196.
8. M. K. Hossain, G. F. Samu, K. Gandha, S. Santhanagopalan, J. P. Liu, C. Janáky and K. Rajeshwar, *J. Phys. Chem. C*, 2017, **121**, 8252-8261.
9. Q. Nie, L. Yang, C. Cao, Y. Zeng, G. Wang, C. Wang and S. Lin, *Chem. Eng. J.*, 2017, **325**, 151-159.
10. N. Xu, F. Li, L. Gao, H. Hu, Y. Hu, X. Long, J. Ma and J. Jin, *Int. J. Hydrogen. Energy*, 2018, **43**, 2064-2072.
11. N. Xu, F. Li, L. Gao, H. Hu, Y. Hu, X. Long, J. Ma and J. Jin, *ACS. Sustain. Chem. Eng.*, 2018, **6**, 7257-7264.
12. J. Li, M. Griep, Y. Choi and D. Chu, *Chem. Commun.*, 2018, **54**, 3331-3334.
13. S. Wei, N. Xu, F. Li, X. Long, Y. Hu, L. Gao, C. Wang, S. Li, J. Ma and J. Jin, *ChemElectroChem*, 2019, **6**, 3367-3374.
14. A. Song, P. Plate, A. Chemseddine, F. Wang, F. F. Abdi, M. Wollgarten, R. van de Krol and S. P. Berglund, *J. Mater. Chem. A*, 2019, **7**, 9183-9194.
15. M. Li, X. Tian, X. Zou, X. Han, C. Du and B. Shan, *Int. J. Hydrogen. Energy*, 2020, **45**, 15121-15128.
16. S. Pulipaka, N. Boni, G. Ummethala and P. Meduri, *J. Catal.*, 2020, **387**, 17-27.
